# Supplementary material for: In silico studies of ASEM analogues targeting α7-nAChR and experimental verification
Source: Royal Society of Chemistry journal article supplement (doi:10.1039/d0ra10435c), 2021-01-01
Supplement: d0ra10435c1.pdf [file d0ra10435c1.pdf]

## **In silico studies of ASEM analogues targeting $\alpha 7$ -nAChR and experimental verification**

Yang Zhou<sup>a</sup>, Guanglin Kuang<sup>b</sup>, Junhao Li<sup>b</sup>, Christer Halldin<sup>c</sup>, Agneta Nordberg<sup>c,d,e</sup>, Bengt

Långström<sup>f</sup>, Yaoquan Tu<sup>b</sup>, and Hans Ågren<sup>a,g\*</sup>

<sup>a</sup>*Department of Physics and Astronomy, Uppsala University, Box 516, SE-751 20 Uppsala, Sweden*

<sup>b</sup>*Division of Theoretical Chemistry and Biology, School of Biotechnology, Royal Institute of Technology (KTH),*

*AlbaNova University Center, S-106 91, Stockholm, Sweden. E-mail: hagren@kth.se*

<sup>c</sup>*Karolinska Institutet, Department of Clinical Neuroscience, Centre for Psychiatric Research, 171 76, Stockholm,*

*Sweden*

<sup>d</sup>*Department of Neurobiology, Care Sciences and Society, Division of Clinical Geriatrics, Center for Alzheimer*

*Research, Neo 141 84 Stockholm and <sup>e</sup>Theme Aging Karolinska University Hospital, S-141 86, Stockholm, Sweden*

<sup>f</sup>*Department of Chemistry, Uppsala University, SE- 751 23 Uppsala, Sweden*

<sup>g</sup>*College of Chemistry and Chemical Engineering, Henan University, Kaifeng, Henan 475004, P.R. China*

## Supporting Information

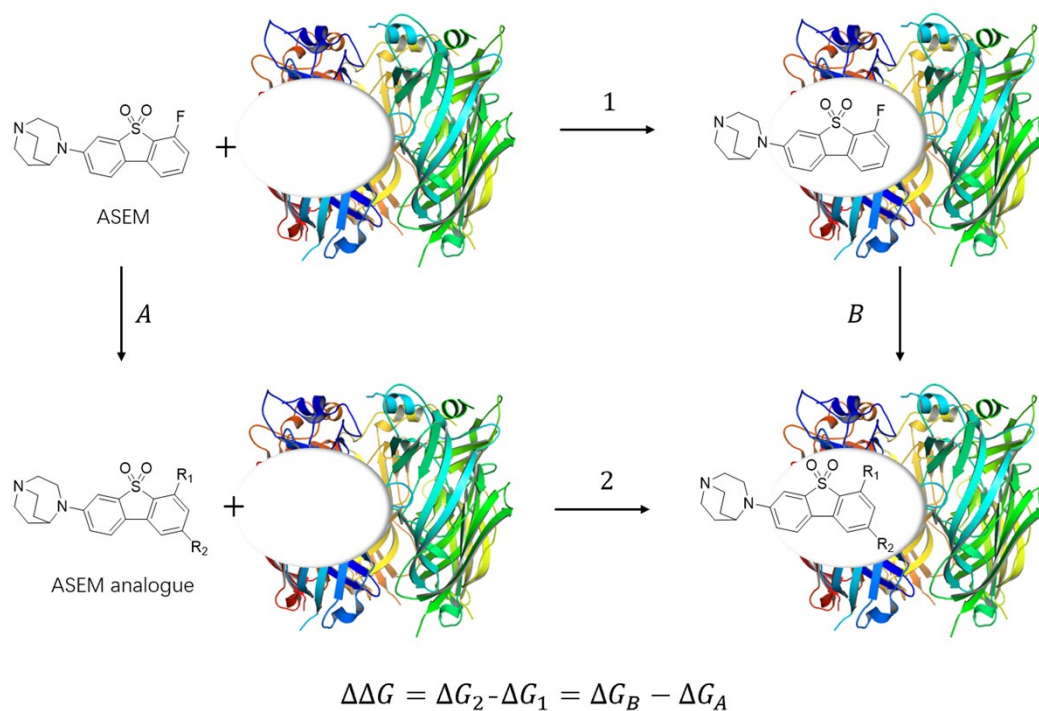

**Figure S1.** Illustration of the thermodynamic cycle, together with the perturbation pathways, used by an FEP+ calculation. The perturbation pathways are represented by arrows A and B. The difference in the binding free energy ( $\Delta\Delta G$ ) between an ASEM analogue ( $\Delta G_2$ ) and ASEM ( $\Delta G_1$ ) is related to the free energy of transforming ASEM to its analogue in the solvent ( $\Delta G_A$ ) and in  $\alpha 7$ -AChBP ( $\Delta G_B$ ).
